# Supplementary material for: Adverse effects following anti–COVID-19 vaccination with mRNA-based BNT162b2 are alleviated by altering the route of administration and correlate with baseline enrichment of T and NK cell genes
Source: PubMed Central journal article supplement (PMC9154185; doi:10.1371/journal.pbio.3001643), 2022-05-31
Supplement: pbio.3001643.s001.pdf [file pbio.3001643.s001.pdf]

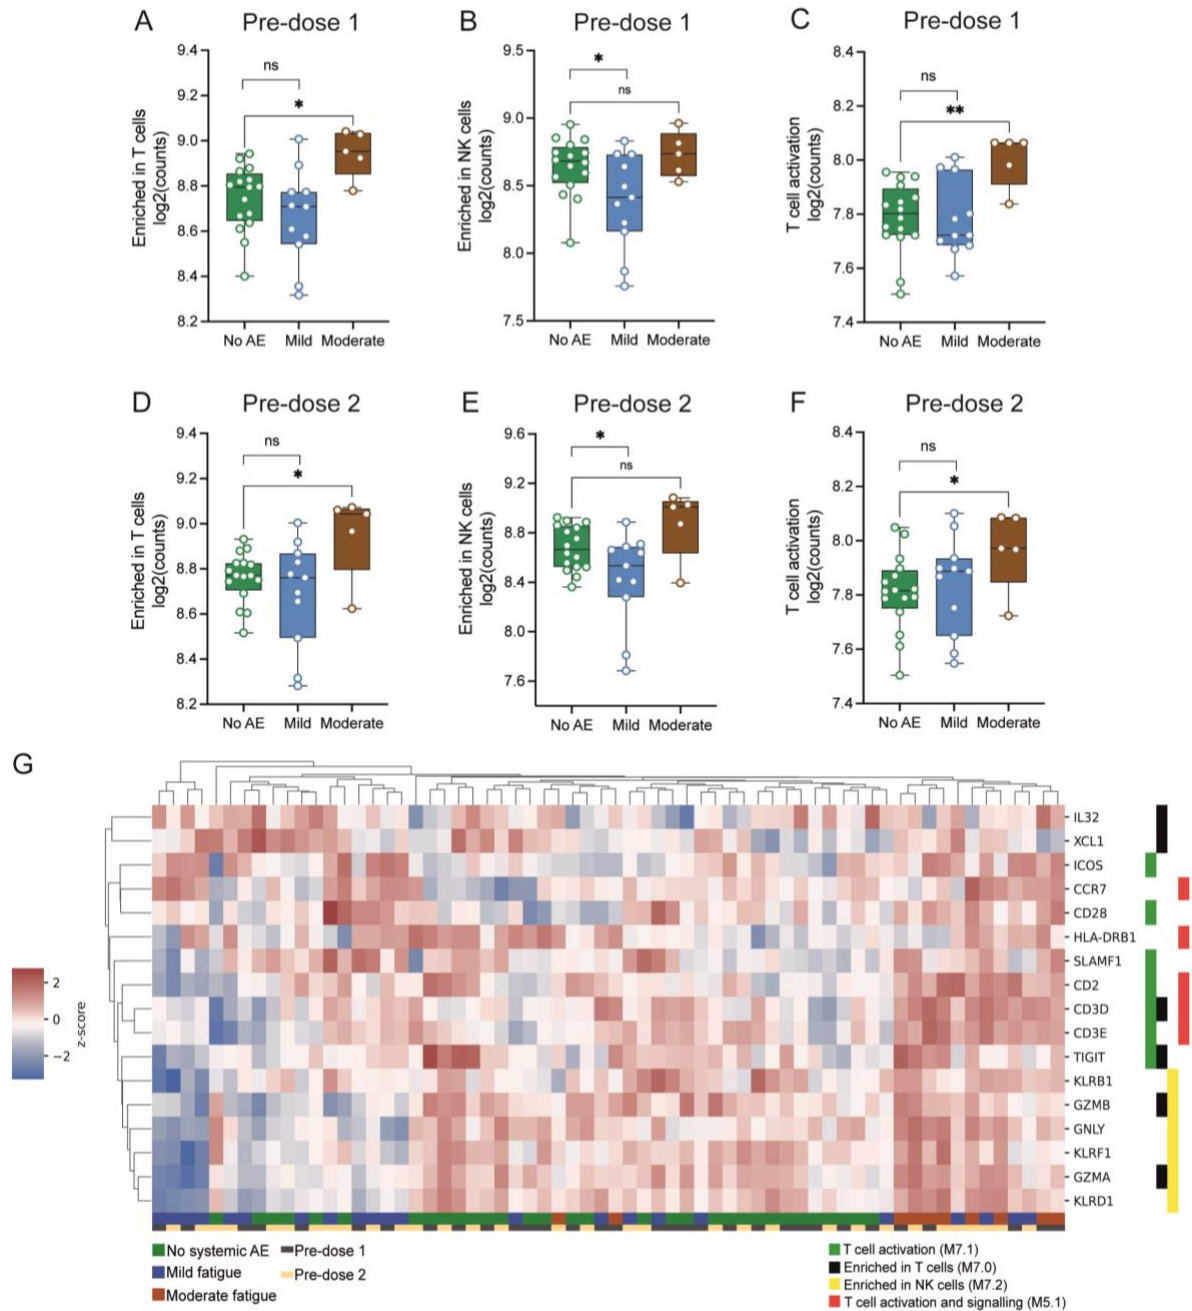

27  
 28 **S1 Fig. Increased levels of genes in pathways associated with T and NK cell activity,**  
 29 **categorized by fatigue severity, measured using the nCounter.**  
 30 **(A-C)** Mean log2 signal of all genes in the top enriched pathways, (A) enriched in T cells, (B)  
 31 enriched in NK cells, and (C) T cell activation at pre-dose 1.  
 32 **(D-F)** Mean log2 signal of all genes in the top enriched pathways, (D) enriched in T cells, (E)  
 33 enriched in NK cells, and (F) T cell activation at pre-dose 2.  
 34 **(G)** Gene expression of the top leading edge genes in the top enriched pathways at pre-dose  
 35 1 and 2. Z scores of raw log2 counts are displayed.  
 36 Data presented as means  $\pm$  SD. Unpaired student's T test were used for experiments  
 37 comparing 2 groups. \* $P < 0.05$ , \*\* $P < 0.01$ , \*\*\*\* $P < 0.0001$ .  
 38 Data underlying this Figure can be found in S2\_Data.  
 39
