# Supplementary material for: Adverse effects following anti–COVID-19 vaccination with mRNA-based BNT162b2 are alleviated by altering the route of administration and correlate with baseline enrichment of T and NK cell genes
Source: PubMed Central journal article supplement (PMC9154185; doi:10.1371/journal.pbio.3001643), 2022-05-31
Supplement: pbio.3001643.s002.pdf [file pbio.3001643.s002.pdf]

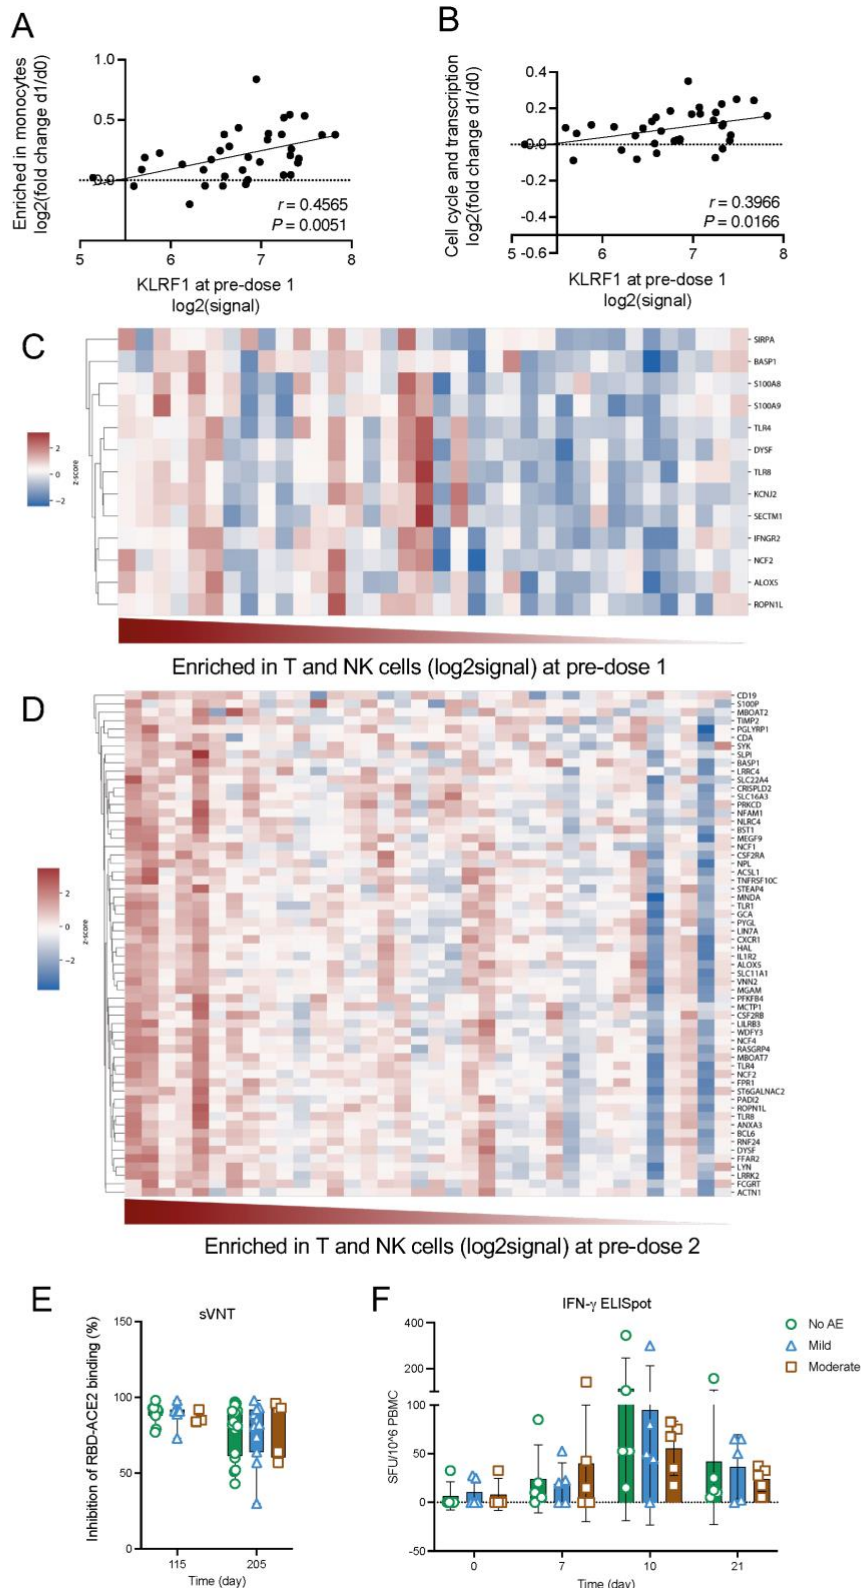

40  
41  
42  
43  
44

**S2 Fig. Correlation of baseline T and NK cell genes with gene expression responses at one day post vaccination and immune response post vaccination. (A-B) Correlation for baseline expression of KLRF1 with enriched in monocytes gene sets (A) and cell cycle and transcription gene sets (B) at one day post-dose 1.**

45 **(C-D)** Heatmap of significantly increased genes in the moderately severe fatigue group of  
46 pathways positively correlated with levels of T and NK cell genes at pre-dose 1 (C) and pre-  
47 dose 2 (D). Mean z-scores of raw log<sub>2</sub> FC (day 1 post-vaccination / pre-dose) are displayed.  
48 **(E)** Inhibition of RBD binding to hACE2 receptor measured using the commercial cPASS kit at  
49 1:20 serum dilution.  
50 **(F)** SARS-CoV-2 spike protein-specific responses to pooled Spike protein peptides were  
51 assessed with IFN $\gamma$  ELISpot assay at days 0, 7, 10 and 21 of first dose of vaccination.  
52 Data underlying this Figure can be found in S2\_Data.  
53  
54
