# Supplementary material for: Adverse effects following anti–COVID-19 vaccination with mRNA-based BNT162b2 are alleviated by altering the route of administration and correlate with baseline enrichment of T and NK cell genes
Source: PubMed Central journal article supplement (PMC9154185; doi:10.1371/journal.pbio.3001643), 2022-05-31
Supplement: pbio.3001643.s006.pdf [file pbio.3001643.s006.pdf]

102  
103  
104  
105

**S1 Table. Subject demographics.** 32 subjects from the healthcare workers cohort were selected for analysis. 5 moderately severe fatigue and 11 mild fatigue cases were age- and gender- matched with subjects with no reported AE.

| Subject Number | AE               | Age | Gender | Ethnicity | Allergy | History of SARS-CoV-2 infection | Medical history                     | Height (m) | Weight (kg) | BMI   |
|----------------|------------------|-----|--------|-----------|---------|---------------------------------|-------------------------------------|------------|-------------|-------|
| S128           | Moderate Fatigue | 34  | Male   | Chinese   | NSAIDs  | No                              | NIL                                 | 1.7        | 65.6        | 22.7  |
| G006           | Moderate Fatigue | 25  | Female | Chinese   | No      | No                              | NIL                                 | 1.68       | 50          | 17.72 |
| G020           | Moderate Fatigue | 40  | Male   | Indian    | No      | No                              | Asthma                              | 1.69       | 70          | 24.51 |
| G024           | Moderate Fatigue | 30  | Female | Chinese   | No      | No                              | NIL                                 | 1.69       | 59          | 20.66 |
| G005           | Moderate Fatigue | 41  | Male   | Chinese   | No      | No                              | NIL                                 | 1.75       | 66          | 21.55 |
| S025           | Mild Fatigue     | 28  | Female | Chinese   | No      | No                              | Gastritis, irritable Bowel Syndrome | 1.67       | 80          | 28.69 |
| S078           | Mild Fatigue     | 50  | Male   | Chinese   | no      | No                              | High blood pressure, gout           | 1.69       | 93          | 32.56 |
| S018           | Mild Fatigue     | 32  | Male   | Chinese   | No      | No                              | NIL                                 | 1.83       | 81          | 24.19 |
| S019           | Mild Fatigue     | 39  | Female | Chinese   | No      | No                              | Hypothyroidism                      | 1.6        | 70          | 27.34 |
| G001           | Mild Fatigue     | 38  | Male   | Chinese   | No      | No                              | NIL                                 | 1.7        | 70          | 24.22 |
| G003           | Mild Fatigue     | 32  | Female | Chinese   | No      | No                              | NIL                                 | 1.53       | 60          | 25.63 |
| G016           | Mild Fatigue     | 55  | Male   | Chinese   | No      | No                              | Hypertension                        | 1.65       | 50          | 18.37 |
| G019           | Mild Fatigue     | 51  | Male   | Chinese   | No      | No                              | Asthma                              | 1.8        | 80          | 24.69 |
| S077           | Mild Fatigue     | 53  | Female | Chinese   | no      | No                              | NIL                                 | 1.72       | 65          | 21.97 |
| S094           | Mild Fatigue     | 33  | Male   | Chinese   | No      | No                              | NIL                                 | 1.66       | 105         | 38.1  |
| G008           | Mild Fatigue     | 41  | Female | Chinese   | No      | No                              | NIL                                 | 1.66       | 54          | 19.6  |
| G009           | No               | 39  | Female | Chinese   | No      | No                              | NIL                                 | 1.55       | 53          | 22.06 |
| G023           | No               | 47  | Male   | Chinese   | No      | No                              | NIL                                 | 1.72       | 68          | 22.99 |
| G028           | No               | 43  | Male   | Chinese   | No      | No                              | Fractured calcaneum s/p surgery     | 1.67       | 67          | 24.02 |
| G031           | No               | 54  | Male   | Chinese   | No      | No                              | Hypertension                        | 1.7        | 58          | 20.07 |
| S110           | No               | 32  | Female | Chinese   | No      | No                              | Left Hemithyroidectomy              | 1.61       | 47          | 18.13 |
| S119           | No               | 32  | Male   | Chinese   | No      | No                              | NIL                                 | 1.78       | 76          | 23.99 |
| S008           | No               | 45  | Male   | Filipino  | No      | No                              | NIL                                 | 1.7        | 71          | 24.57 |

|      |    |    |        |         |               |    |                                                        |      |       |       |
|------|----|----|--------|---------|---------------|----|--------------------------------------------------------|------|-------|-------|
| S009 | No | 32 | Male   | Malay   | No            | No | NIL                                                    | 1.7  | 67    | 23.18 |
| S029 | No | 34 | Male   | Chinese | No            | No | NIL                                                    | 1.74 | 80    | 26.42 |
| S041 | No | 53 | Male   | Chinese | no            | No | NIL                                                    | 1.6  | 65    | 25.39 |
| S013 | No | 50 | Female | Chinese | Chlormezanone | No | NIL                                                    | 1.54 | 57    | 24.03 |
| S060 | No | 27 | Female | Chinese | no            | No | Lasik                                                  | 1.54 | 54    | 22.77 |
| S070 | No | 44 | Female | Chinese | no            | No | Ovarian<br>cystectomy                                  | 1.56 | 53    | 21.78 |
| S081 | No | 31 | Male   | Chinese | sulfanamide   | No | Appendectomy                                           | 1.76 | 64    | 20.66 |
| S072 | No | 33 | Female | Chinese | no            | No | NIL                                                    | 1.5  | 46    | 20.44 |
| S073 | No | 29 | Female | Chinese | no            | No | Left level cervical<br>lymph node<br>incisional biopsy | 1.63 | 64.25 | 24.18 |

106  
107
