# Supplementary material for: Adverse effects following anti–COVID-19 vaccination with mRNA-based BNT162b2 are alleviated by altering the route of administration and correlate with baseline enrichment of T and NK cell genes
Source: PubMed Central journal article supplement (PMC9154185; doi:10.1371/journal.pbio.3001643), 2022-05-31
Supplement: pbio.3001643.s007.pdf [file pbio.3001643.s007.pdf]

108 **S2 Table. Guidelines for grading of fatigue.** Subjects were monitored for onset of AEs  
109 within the first 7 days of receiving dose 1 and dose 2 of the vaccine. Subject who reported  
110 AEs were followed up until resolution of AEs. The grading system for fatigue follows the  
111 guidelines set by the US FDA on preventive vaccine clinical trials.  
112

|         | <b>Mild (Grade 1)</b>         | <b>Moderate (Grade 2)</b>       | <b>Severe (Grade 3)</b>              | <b>Potentially Life Threatening (Grade 4)</b> |
|---------|-------------------------------|---------------------------------|--------------------------------------|-----------------------------------------------|
| Fatigue | No interference with activity | Some interference with activity | Significant; prevents daily activity | ER visit or hospitalization                   |

113  
114
