# Supplementary material for: Adverse effects following anti–COVID-19 vaccination with mRNA-based BNT162b2 are alleviated by altering the route of administration and correlate with baseline enrichment of T and NK cell genes
Source: PubMed Central journal article supplement (PMC9154185; doi:10.1371/journal.pbio.3001643), 2022-05-31
Supplement: pbio.3001643.s008.pdf [file pbio.3001643.s008.pdf]

115 **S3 Table. Clinical monitoring sheet for *in vivo* study.** Clinical symptoms tracked in animals  
 116 vaccinated with BNT162b for the first 10 days post vaccination. Any animal with a score of 5  
 117 in a single category, overall score of 10 or weight loss of more than 20% is euthanized. Clinical  
 118 monitoring sheet is adapted from the Univeristy of British Columbia Animal Care and Use  
 119 program.  
 120

| <b>Clinical Symptoms</b>     | <b>Clinical Score</b> |
|------------------------------|-----------------------|
| Nothing Abnormal             | 0                     |
| <b>Body Weight (g)</b>       |                       |
| 5-9% loss                    | 1                     |
| 10-14% loss                  | 2                     |
| 15-20% loss                  | 3                     |
| <b>Hydration</b>             |                       |
| Dry Eyes                     | 1                     |
| Sunken Eyes                  | 2                     |
| Signs of Weakness            |                       |
| Mild Ruffled fur             | 1                     |
| Marked Ruffled fur           | 2                     |
| Hunched (while sitting)      | 2                     |
| Hunched (sit and walk)       | 3                     |
| <b>CNS Dysfunction</b>       |                       |
| Abnormal Gait                | 1                     |
| Shaking (occasionally)       | 2                     |
| Shaking (constantly)         | 5                     |
| Paralysis                    | 5                     |
| <b>Respiratory Distress</b>  |                       |
| Nasal Discharge              | 1                     |
| Shallow Rapid Breathing      | 2                     |
| Abdomnal effort in breathing | 3                     |
| Slow labored breathing       | 4                     |
| Gasping                      | 4                     |
| <b>Lethargy</b>              |                       |
| Slow moving                  | 2                     |
| Slow when stimulated         | 3                     |
| No response when stimulated  | 5                     |

121  
 122
